# Supplementary material
Source: MDPI journal article supplement (https://www.mdpi.com/2227-9717/11/11/3244)
Supplement: s1 [file s1]

# Exploration of Eco-Friendly Hydrochar's Potential in Advanced Oxidative Processes for Dicamba Degradation within a Circular Bio-Economy Framework

**Tiago Guimarães <sup>1</sup>, Elisa Maria Gomes da Silva <sup>2</sup>, Adalin Cezar Moraes de Aguiar <sup>2</sup>, Marcelo Moreira da Costa <sup>3</sup>, Kamila Cabral Mielke <sup>2</sup>, Kassio Ferreira Mendes <sup>2</sup>, Antonio Alberto da Silva <sup>2</sup>, Ana Paula de Carvalho Teixeira <sup>4</sup> and Renata Pereira Lopes Moreira <sup>1,\*</sup>**

<sup>1</sup> Chemistry Department, Federal University of Viçosa, Viçosa 36570-900, MG, Brazil; tguimaraes.quimica@gmail.com

<sup>2</sup> Phytotechnics Department, Federal University of Viçosa, Viçosa 36570-900, MG, Brazil; elisasilva.agro@gmail.com (E.M.G.d.S.); adalin-cezar@hotmail.com (A.C.M.d.A.); kamilamielke@hotmail.com (K.C.M.); kfmendes@ufv.br (K.F.M.); aasilva@ufv.br (A.A.d.S.)

<sup>3</sup> Forest Engineer Department, Federal University of Viçosa, Viçosa 36570-900, MG, Brazil; mmdc@ufv.br

<sup>4</sup> Chemistry Department, Federal University of Minas Gerais, Belo Horizonte 31270-901, MG, Brazil; anapaula.cta1@gmail.com

\* Correspondence: renata.plopes@ufv.br

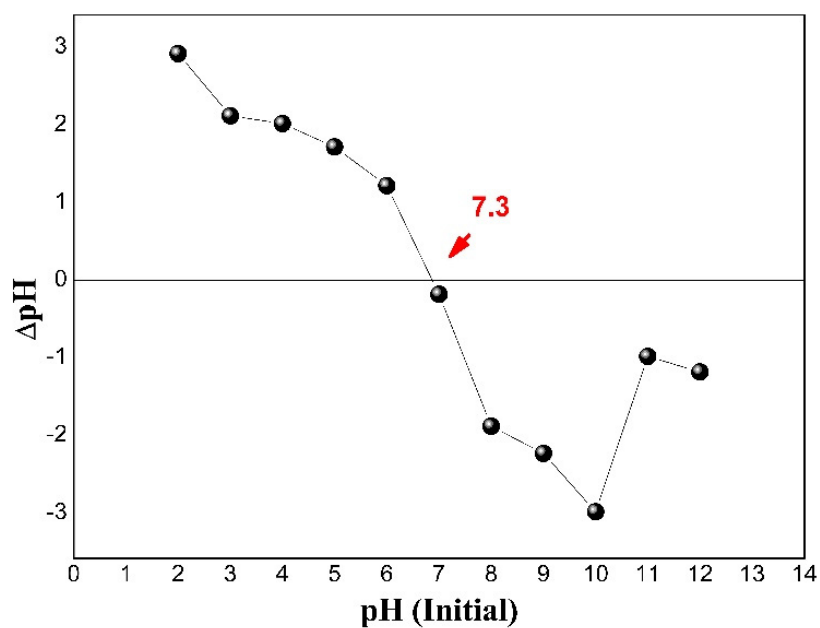

**Figure S1.**  $\text{pH}_{\text{PZC}}$  for Hy-Fe produced via hydrothermal synthesis (HTC).

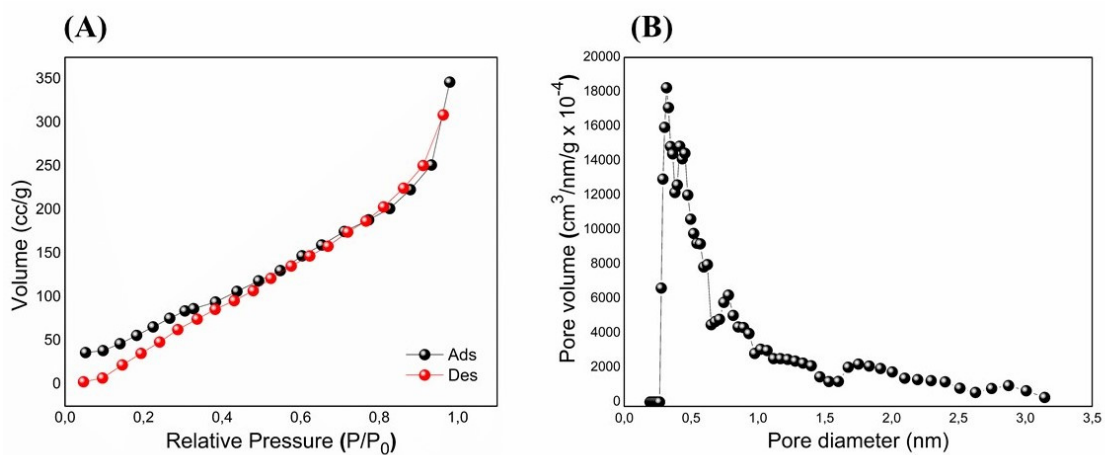

**Figure S2.** (A) N<sub>2</sub> adsorption-desorption isotherms and (B) Pore distribution for Hy-Fe produced via hydrothermal synthesis.

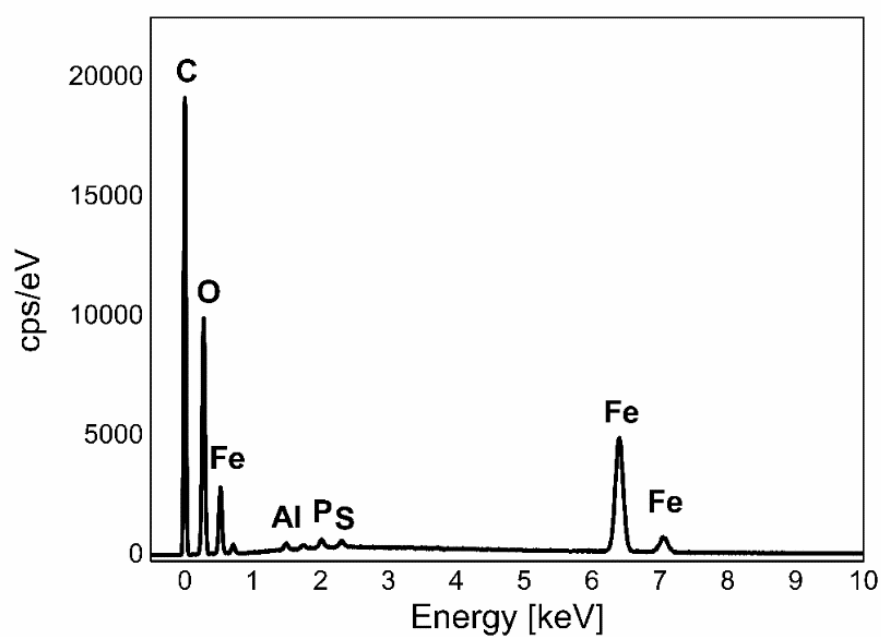

**Figure S3.** EDS analysis for Hy-Fe produced via hydrothermal synthesis (HTC).

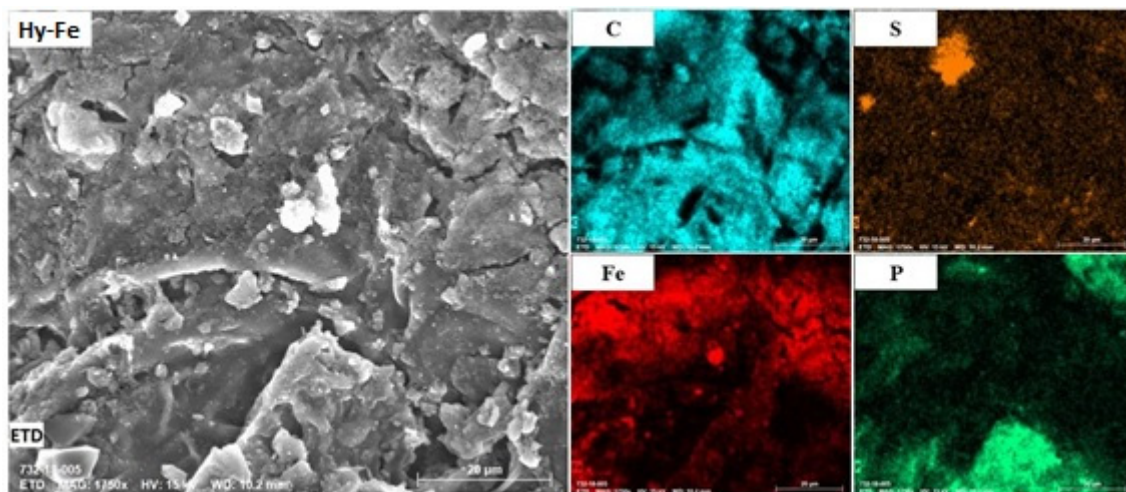

**Figure S4.** Chemical element mapping by EDS for Hy-Fe produced via hydrothermal synthesis (HTC).

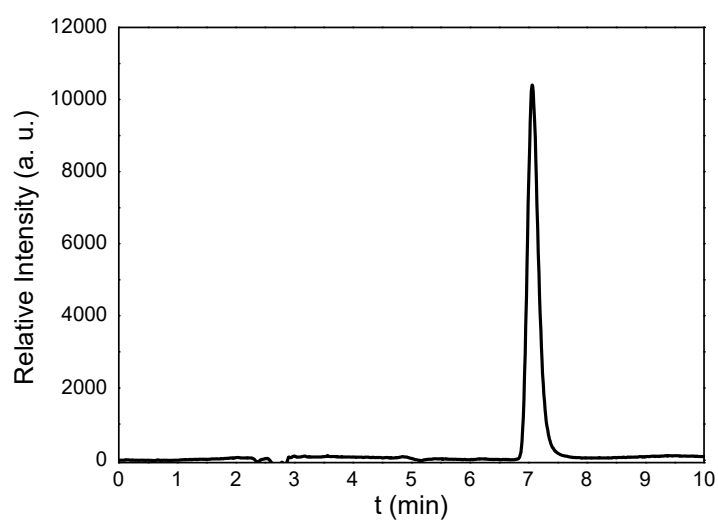

**Figure S5.** Chromatogram of standard dicamba (50.00 mg L<sup>-1</sup>). Analysis conditions: C18 column, Keystone NA (Keystone Scientific, Bellefonte, PA), mobile phase of (v/v) 50% of acetonitrile/50% of H<sub>2</sub>O with 0.01 % H<sub>3</sub>PO<sub>4</sub> and flow rate of 1.00 mL min<sup>-1</sup>, with quantification at 275 nm.

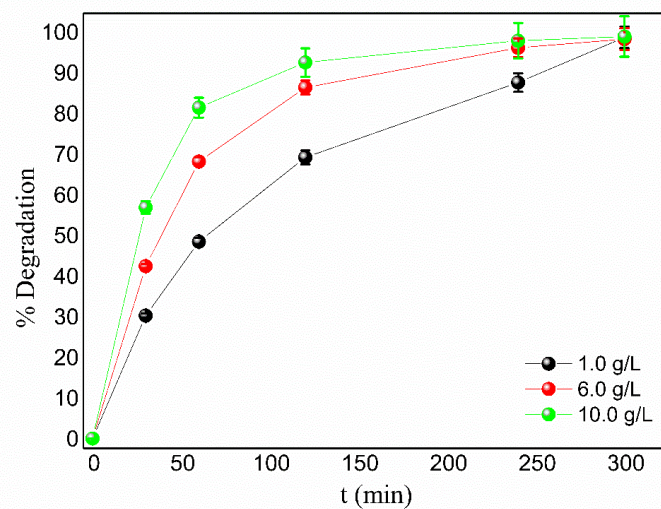

**Figure S6.** Evaluation of Hy-Fe dose on dicamba degradation. Experimental conditions: 100.00 mL of dicamba solution (50.00 mg L<sup>-1</sup>); 1.00 mL of H<sub>2</sub>O<sub>2</sub> 1.00 mmol L<sup>-1</sup>; 1.00 mL of aluminum sulfate solution (Al<sub>2</sub>(SO<sub>4</sub>)<sub>3</sub>) (1.00 mol L<sup>-1</sup>); 25 °C.

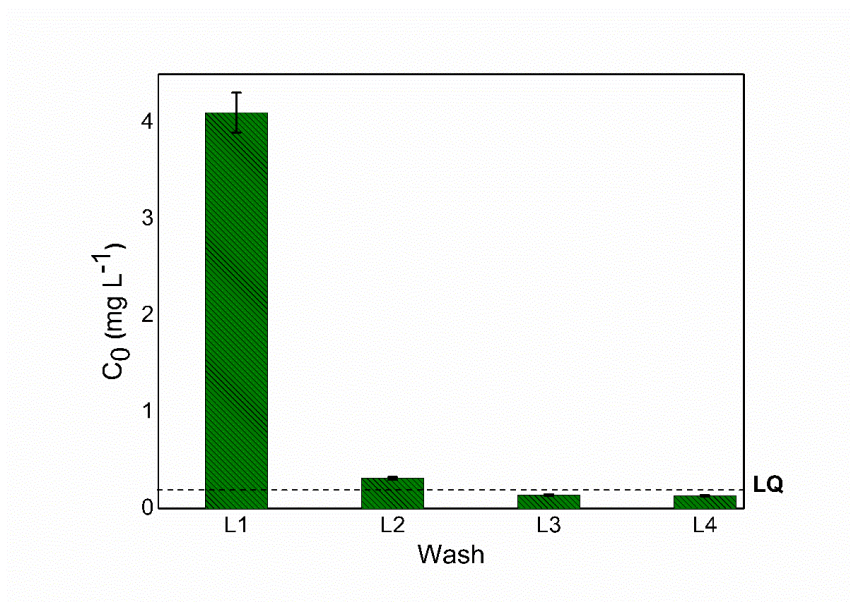

**Figure S7.** Quantification of dicamba concentration found in the different Personal Protective Equipment (PPE) washes.

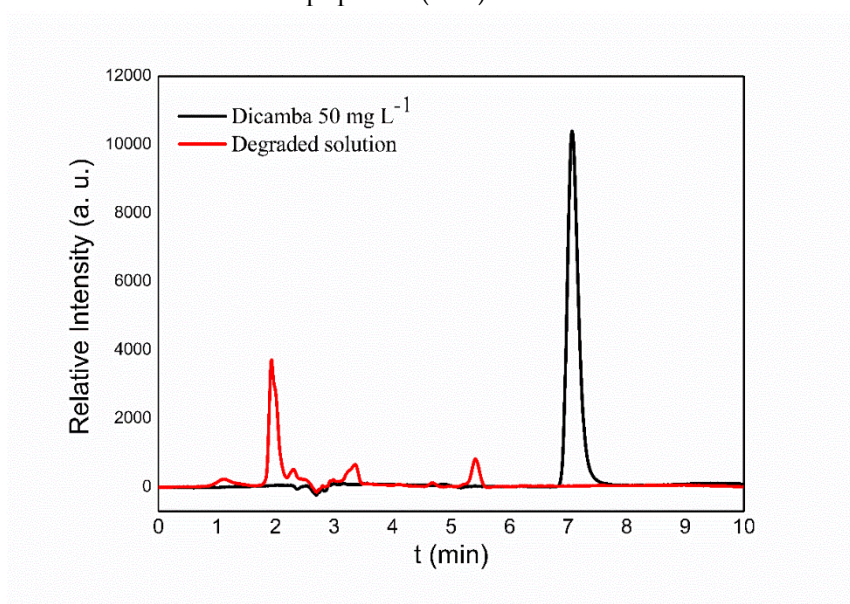

**Figure S8.** Comparison of the chromatogram of a 50.00 mg L<sup>-1</sup> commercial dicamba solution, and the same solution after the degradation process for 5 hours. Analysis conditions: C18 column, Keystone NA (Keystone Scientific, Bellefonte, PA), mobile phase of (v/v) 50% acetonitrile/ 50% of H<sub>2</sub>O with 0.01 % H<sub>3</sub>PO<sub>4</sub> and flow rate of 1.00 ml min<sup>-1</sup>, with quantification at 275 nm.

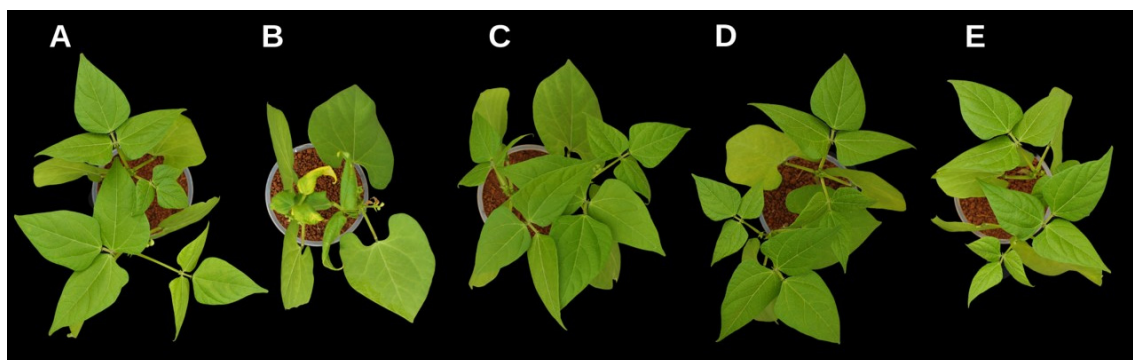

**Figure S9.** Apparent intoxication at 21 DAA (A) control solution (water), (B) commercial dicamba 50.00 mg L<sup>-1</sup>, (C) commercial dicamba 50.00 mg L<sup>-1</sup> degraded with Hy-Fe 1.00 g L<sup>-1</sup>, (D) commercial dicamba 50.00 mg L<sup>-1</sup> degraded with Hy-Fe 6.00 g L<sup>-1</sup> e (E) commercial dicamba 50.00 mg L<sup>-1</sup> degraded with Hy-Fe 10.00 g L<sup>-1</sup>.

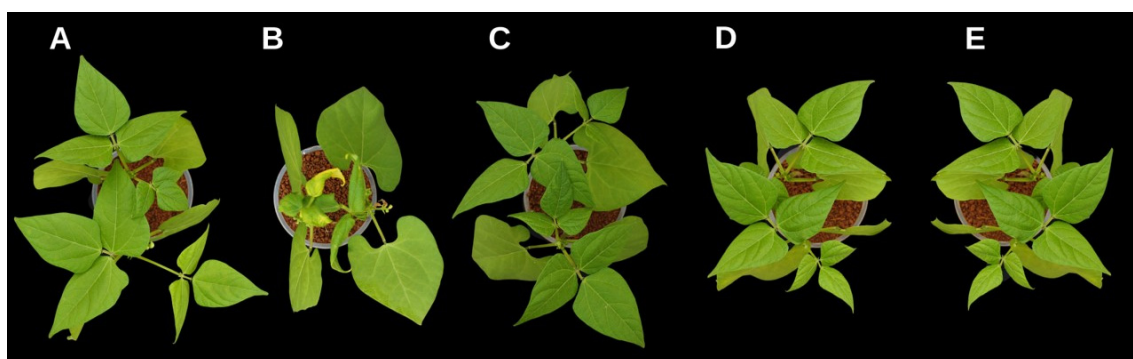

**Figure S10.** Apparent intoxication at 21 DAA (A) control solution (water), (B) commercial dicamba 50.00 mg L<sup>-1</sup>, (C) commercial dicamba 50.00 mg L<sup>-1</sup> degraded with constant agitation, (D) commercial dicamba 50.00 mg L<sup>-1</sup> degraded with periodic agitation and (E) commercial dicamba 50.00 mg L<sup>-1</sup> degraded without agitation.

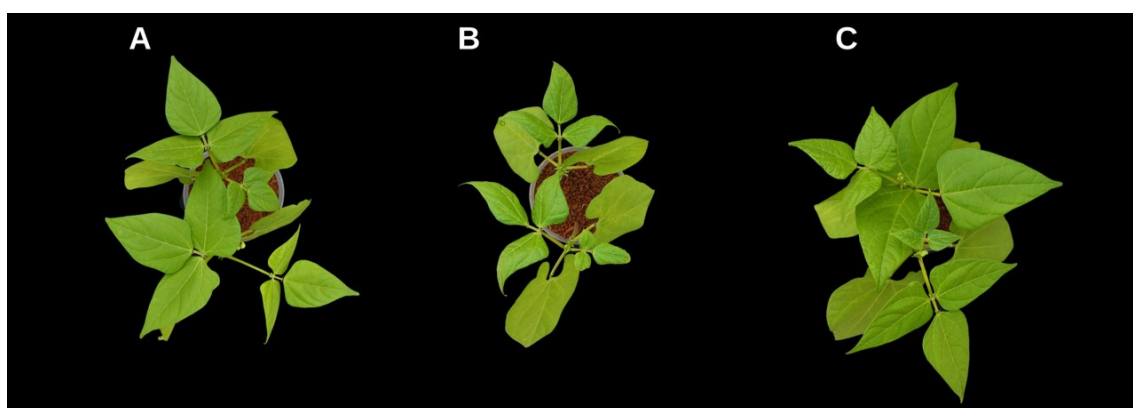

**Figure S11.** Apparent intoxication at 21 DAA (A) control solution (water), (B) commercial dicamba 5.00 mg L<sup>-1</sup>, (C) commercial dicamba 5.00 mg L<sup>-1</sup> degraded.

**Table S1.** Chemical composition of the inorganic portion of Hy-Fe by FRX.

| Sample | Fe <sub>2</sub> O <sub>3</sub> | SiO <sub>2</sub> | Al <sub>2</sub> O <sub>3</sub> | SO <sub>3</sub> | P <sub>2</sub> O <sub>5</sub> | K <sub>2</sub> O | CaO   | Co <sub>2</sub> O <sub>3</sub> |
|--------|--------------------------------|------------------|--------------------------------|-----------------|-------------------------------|------------------|-------|--------------------------------|
|        | mass%                          | mass%            | mass%                          | mass%           | mass%                         | mass%            | mass% | mass%                          |
| Hy-Fe  | 52.41                          | 19.82            | 14.30                          | 5.81            | 4.19                          | 0.13             | 0.10  | 0.14                           |
|        | 51.91                          | 19.81            | 15.19                          | 5.72            | 4.12                          | 0.12             | 0.11  | 0.13                           |

**Table S2.** Room temperature hyperfine parameters of Hy-Fe.

| Samples | Fases               | $\delta$ ( $\pm$ 0.05)<br>mm/s | $/2\xi q$ ( $\pm$ 0.05)<br>mm/s | $B_{\text{HF}}$ ( $\pm$ 0.5)<br>Tesla | Area (%) |
|---------|---------------------|--------------------------------|---------------------------------|---------------------------------------|----------|
| Hy-Fe   | (Fe <sup>3+</sup> ) | 0.25                           | 0.53                            | -                                     | 100      |
